# Supplementary material for: Human Aurora kinase inhibitor Hesperadin reveals epistatic interaction between Plasmodium falciparum PfArk1 and PfNek1 kinases
Source: PubMed Central journal article supplement (PMC7679417; doi:10.1038/s42003-020-01424-z), 2020-11-20
Supplement: 42003_2020_1424_MOESM2_ESM.pdf [file 42003_2020_1424_MOESM2_ESM.pdf]

## **Description of Additional Supplementary Files**

**File Name:** Supplementary Data 1

**Description:** Numerical data used to build the plots in figures 1a, 2b, 3 and 7.
